# Supplementary material for: Tillage Practices and Residue Management Manipulate Soil Bacterial and Fungal Communities and Networks in Maize Agroecosystems
Source: MDPI journal article supplement (doi:10.3390/microorganisms10051056), 2022-05-20
Supplement: s1 [file s1]

**Table S1.** Two way ANOVA examining the effects of tillage practice (T) and residue management (R) on OTU richness (S), Shannon diversity index (*H*) and Pielou evenness index (*J*) of bacteria and fungi in the year 2017 and 2018.

|          |          | T        |          |          |          | R        |          |          |          | T × R    |          |          |          |
|----------|----------|----------|----------|----------|----------|----------|----------|----------|----------|----------|----------|----------|----------|
|          |          | 2017     |          | 2018     |          | 2017     |          | 2018     |          | 2017     |          | 2018     |          |
|          |          | <i>F</i> | <i>P</i> |
| Bacteria | <i>H</i> | 0.02     | 0.89     | 0.46     | 0.51     | 0.36     | 0.56     | 0.33     | 0.58     | 0.64     | 0.44     | 0.31     | 0.59     |
|          | <i>S</i> | 0.05     | 0.83     | 0.25     | 0.62     | 0.44     | 0.52     | 0.09     | 0.76     | 1.13     | 0.31     | 0.04     | 0.86     |
|          | <i>J</i> | 0.05     | 0.82     | 1.08     | 0.31     | 0.33     | 0.57     | 0.40     | 0.54     | 0.53     | 0.48     | 0.61     | 0.45     |
| Fungi    | <i>H</i> | 0.003    | 0.96     | 3.23     | 0.09     | 0.36     | 0.56     | 0.007    | 0.94     | 0.17     | 0.69     | 1.27     | 0.28     |
|          | <i>S</i> | 0.69     | 0.57     | 5.79     | 0.03     | 0.80     | 0.39     | 0.18     | 0.68     | 0.08     | 0.78     | 5.70     | 0.03     |
|          | <i>J</i> | 0.004    | 0.95     | 8.94     | 0.01     | 0.23     | 0.64     | 0.05     | 0.82     | 0.26     | 0.62     | 0.25     | 0.63     |

**Table S2.** Pairwise PERMANOVA comparisons testing the differences of soil bacterial and fungal communities among tillage practices in the year 2018.

|          | NT-RT |      | NT-DT |       | RT-DT |      |
|----------|-------|------|-------|-------|-------|------|
|          | $r^2$ | $P$  | $r^2$ | $P$   | $r^2$ | $P$  |
| Bacteria | 0.13  | 0.08 | 0.18  | 0.002 | 0.10  | 0.39 |
| Fungi    | 0.14  | 0.07 | 0.17  | 0.02  | 0.11  | 0.27 |

**Table S3.** Classification of enriched or depleted bacterial and fungal OTUs by residue retention in 2017 and 2018.

| Bacteria-2017 |                       |                                   | Bacteria-2018 |                       |                                      |
|---------------|-----------------------|-----------------------------------|---------------|-----------------------|--------------------------------------|
| OTU<br>name   | Enriched/d<br>epleted | Classification                    | OTU<br>name   | Enriched/<br>depleted | classification                       |
| OTU323        | enriched              | <i>Actinoplanes regularis</i>     | OTU323        | enriched              | <i>Actinoplanes regularis</i>        |
| OTU570        | enriched              | Uncultured <i>Flexibacter</i> sp. | OTU453        | enriched              | <i>Actinoplanes liguriensis</i>      |
| OTU130        | enriched              | <i>Pseudomonas</i> sp.            | OTU223        | enriched              | <i>Aeromicrobium panaciterrae</i>    |
| OTU82         | enriched              | Uncultured bacterium              | OTU495        | enriched              | Uncultured bacterium                 |
| OTU918        | enriched              | Uncultured                        | OTU218        | enriched              | <i>Rhizobium ipomoeae</i>            |
| OTU241        | enriched              | Uncultured bacterium              | OTU824        | enriched              | Uncultured beta proteobacterium      |
| OTU423        | enriched              | Uncultured                        | OTU85         | enriched              | <i>Bacillus</i> sp.                  |
| OTU667        | enriched              | Uncultured bacterium              | OTU26         | enriched              | <i>Bacillus bataviensis</i>          |
| OTU483        | enriched              | Uncultured                        | OTU11         | enriched              | <i>Bacillus megaterium</i>           |
| OTU377        | enriched              | Uncultured                        | OTU89         | enriched              | Uncultured                           |
| OTU724        | enriched              | Uncultured                        | OTU97         | enriched              | Uncultured                           |
| OTU239        | enriched              | Uncultured                        | OTU164        | enriched              | <i>Caballeronia glebae</i>           |
| OTU175        | enriched              | Uncultured                        | OTU119        | enriched              | Uncultured <i>Burkholderia</i> sp.   |
| OTU158        | enriched              | Uncultured                        | OTU178        | enriched              | Uncultured bacterium                 |
| OTU670        | enriched              | Uncultured                        | OTU152        | enriched              | Uncultured Verrucomicrobia bacterium |
| OTU331        | enriched              | Uncultured                        | OTU175        | enriched              | Uncultured                           |
| OTU295        | enriched              | Uncultured                        | OTU542        | enriched              | Bacterium Ellin513                   |

|         |          |                                        |
|---------|----------|----------------------------------------|
| OTU111  | enriched | Uncultured                             |
| OTU469  | enriched | Uncultured                             |
| OTU497  | depleted | <i>Arachidicoccus</i> sp.              |
| OTU1263 | depleted | <i>Asticcacaulis</i> sp.               |
| OTU1229 | depleted | Uncultured                             |
| OTU194  | depleted | Uncultured Gemmatimonadaceae bacterium |
| OTU555  | depleted | Uncultured bacterium                   |
| OTU155  | depleted | Uncultured bacterium                   |
| OTU358  | depleted | Uncultured bacterium                   |
| OTU251  | depleted | Uncultured <i>Niastella</i> sp.        |
| OTU375  | depleted | Uncultured bacterium                   |
| OTU1242 | depleted | Uncultured bacterium                   |
| OTU732  | depleted | Uncultured bacterium                   |
| OTU394  | depleted | Uncultured bacterium                   |
| OTU113  | depleted | Uncultured                             |
| OTU100  | depleted | Uncultured                             |
| OTU1150 | depleted | Uncultured                             |
| OTU227  | depleted | Uncultured                             |

|        |          |                                        |
|--------|----------|----------------------------------------|
| OTU131 | enriched | <i>Cryobacterium</i> sp. C1205         |
| OTU50  | enriched | metagenome                             |
| OTU964 | enriched | metagenome                             |
| OTU92  | enriched | Uncultured <i>Kribbella</i> sp.        |
| OTU285 | enriched | metagenome                             |
| OTU109 | enriched | <i>Luteibacter</i> sp. 329MFSHa        |
| OTU173 | enriched | Uncultured bacterium                   |
| OTU736 | enriched | <i>Mucilaginibacter rigui</i>          |
| OTU296 | enriched | Uncultured <i>Mucilaginibacter</i> sp. |
| OTU229 | enriched | <i>Niastella koreensis</i>             |
| OTU494 | enriched | <i>Pandoraea apista</i>                |
| OTU405 | enriched | Uncultured <i>Pedobacter</i> sp.       |
| OTU472 | enriched | Uncultured bacterium                   |
| OTU350 | enriched | <i>Pseudolabrys</i> sp. Root1462       |
| OTU321 | enriched | Uncultured bacterium                   |
| OTU210 | enriched | <i>Rhodopseudomonas</i> sp.            |
| OTU954 | enriched | <i>Sorangium cellulosum</i>            |
| OTU177 | enriched | <i>Sphingomonas</i> sp.                |
| OTU532 | enriched | <i>Stenotrophomonas</i> sp. G4         |
| OTU888 | enriched | <i>Parastreptomyces abscessus</i>      |
| OTU306 | enriched | <i>Tumebacillus ginsengisoli</i>       |

|        |          |                                       |
|--------|----------|---------------------------------------|
| OTU356 | enriched | Uncultured Chitinophagaceae bacterium |
| OTU48  | enriched | Uncultured bacterium                  |
| OTU66  | enriched | Uncultured proteobacterium            |
| OTU212 | enriched | Uncultured bacterium                  |
| OTU724 | enriched | Uncultured                            |
| OTU247 | enriched | Uncultured Acidobacteria bacterium    |
| OTU853 | enriched | Uncultured                            |
| OTU124 | enriched | Uncultured                            |
| OTU36  | depleted | Uncultured bacterium                  |
| OTU252 | depleted | Uncultured bacterium                  |
| OTU86  | depleted | Uncultured bacterium                  |
| OTU88  | depleted | Uncultured bacterium                  |
| OTU1   | depleted | Uncultured Xanthomonadaceae bacterium |
| OTU190 | depleted | Uncultured Xanthomonadaceae bacterium |
| OTU378 | depleted | Uncultured beta proteobacterium       |
| OTU718 | depleted | Uncultured bacterium                  |
| OTU623 | depleted | <i>Janibacter hoylei</i> PVAS-1       |
| OTU184 | depleted | Uncultured Xanthomonadaceae bacterium |
| OTU249 | depleted | Uncultured bacterium                  |
| OTU233 | depleted | Uncultured beta proteobacterium       |
| OTU806 | depleted | Uncultured bacterium                  |

|        |          |                                         |
|--------|----------|-----------------------------------------|
| OTU2   | depleted | Uncultured bacterium                    |
| OTU127 | depleted | Uncultured Sphingobacteriales bacterium |
| OTU627 | depleted | Uncultured                              |
| OTU307 | depleted | Uncultured                              |
| OTU891 | depleted | Uncultured                              |
| OTU141 | depleted | Uncultured                              |
| OTU719 | depleted | Uncultured                              |
| OTU991 | depleted | Uncultured bacterium                    |
| OTU508 | depleted | Uncultured                              |
| OTU84  | depleted | Uncultured                              |

| Fungi-2017 |                   |                                    | Fungi-2018 |                   |                                    |
|------------|-------------------|------------------------------------|------------|-------------------|------------------------------------|
| OTU name   | Enriched/depleted | Classification                     | OTU name   | Enriched/depleted | Classification                     |
| OTU121     | enriched          | <i>Cadophora</i> sp.               | OTU44      | enriched          | <i>Cladosporium exasperatum</i>    |
| OTU38      | enriched          | <i>Exophiala salmonis</i>          | OTU34      | enriched          | <i>Conocybe crispa</i>             |
| OTU26      | enriched          | <i>Fusicolla aquaeductuum</i>      | OTU38      | enriched          | <i>Exophiala salmonis</i>          |
| OTU12      | enriched          | <i>Leptosphaeria sclerotioides</i> | OTU166     | enriched          | <i>Exophiala bonariae</i>          |
| OTU348     | enriched          | <i>Occultifur externus</i>         | OTU243     | enriched          | <i>Kazachstania exigua</i>         |
| OTU207     | enriched          | <i>Rhizophlyctis rosea</i>         | OTU12      | enriched          | <i>Leptosphaeria sclerotioides</i> |
| OTU240     | enriched          | <i>Scutellinia scutellata</i>      | OTU66      | enriched          | <i>Monodictys</i> sp.              |
| OTU35      | enriched          | <i>Sphaerobolus ingoldii</i>       | OTU83      | enriched          | <i>Oidiodendron cereale</i>        |

|        |          |                                       |
|--------|----------|---------------------------------------|
| OTU118 | enriched | <i>Spizellomyces dolichospermus</i>   |
| OTU318 | enriched | <i>Talaromyces sayulitensis</i>       |
| OTU167 | enriched | Phaeosphaeriaceae sp.                 |
| OTU16  | enriched | Lasiosphaeriaceae sp.                 |
| OTU699 | enriched | Ascomycota sp.                        |
| OTU387 | enriched | Hypocreales sp.                       |
| OTU464 | enriched | Chaetomiaceae sp.                     |
| OTU9   | depleted | <i>Conlarium</i> sp.                  |
| OTU160 | depleted | <i>Drechslera</i> sp.                 |
| OTU176 | depleted | <i>Echria</i> sp.                     |
| OTU113 | depleted | <i>Gaeumannomyces radicicola</i>      |
| OTU253 | depleted | <i>Humicola</i> sp.                   |
| OTU174 | depleted | <i>Ophiosphaerella korrae</i>         |
| OTU62  | depleted | <i>Plenodomus biglobosus</i>          |
| OTU188 | depleted | <i>Septoriella hirta</i>              |
| OTU218 | depleted | <i>Setosphaeria pedicellata</i>       |
| OTU172 | depleted | <i>Spizellomyces pseudodichotomus</i> |
| OTU191 | depleted | <i>Tomentellopsis submollis</i>       |
| OTU610 | depleted | Xylariales sp.                        |
| OTU603 | depleted | GS19 sp.                              |
| OTU324 | depleted | Eurotiales sp.                        |

|        |          |                                 |
|--------|----------|---------------------------------|
| OTU131 | enriched | Oidiodendron sp.                |
| OTU403 | enriched | <i>Podospora</i> sp.            |
| OTU188 | enriched | <i>Septoriella hirta</i>        |
| OTU134 | enriched | <i>Togninia africana</i>        |
| OTU86  | enriched | Leptosphaeriaceae sp.           |
| OTU77  | enriched | Pyronemataceae sp.              |
| OTU178 | enriched | Pleosporales sp.                |
| OTU346 | enriched | Pleosporales sp.                |
| OTU327 | enriched | Auriculariales sp.              |
| OTU374 | enriched | <i>Xenasmatella borealis</i>    |
| OTU161 | depleted | <i>Alternaria subcucurbitae</i> |
| OTU223 | depleted | <i>Clitopilus</i> sp.           |
| OTU160 | depleted | <i>Drechslera</i> sp.           |
| OTU23  | depleted | <i>Mortierella elongata</i>     |
| OTU174 | depleted | <i>Ophiosphaerella korrae</i>   |
| OTU304 | depleted | Pleosporales sp.                |
| OTU193 | depleted | Fungi sp.                       |
| OTU461 | depleted | Lasiosphaeriaceae sp.           |
| OTU71  | depleted | Ascomycota sp.                  |
| OTU418 | depleted | Ascomycota sp.                  |

|        |          |                       |
|--------|----------|-----------------------|
| OTU325 | depleted | Helotiales sp.        |
| OTU159 | depleted | Fungi sp.             |
| OTU222 | depleted | Pleosporales sp.      |
| OTU202 | depleted | Hypocreales sp.       |
| OTU209 | depleted | Chionosphaeraceae sp. |
| OTU79  | depleted | Sordariales sp.       |
| OTU52  | depleted | Ascomycota sp.        |
| OTU108 | depleted | Pleosporales sp.      |

---



**Table S4.** One way ANOVA examining the effects of tillage practice on the P/N ratio, connectedness, average degree and modularity of bacterial and fungal networks

|          |                | 2017     |                       | 2018     |                       |
|----------|----------------|----------|-----------------------|----------|-----------------------|
|          |                | <i>F</i> | <i>P</i>              | <i>F</i> | <i>P</i>              |
| Bacteria | P/N ratio      | 692.1    | $1.69 \times e^{-15}$ | 68.71    | $2.80 \times e^{-08}$ |
|          | connectedness  | 5123     | $1.08 \times e^{-17}$ | 394.1    | $1.08 \times e^{-13}$ |
|          | average.degree | 279      | $1.36 \times e^{-12}$ | 100.5    | $2.06 \times e^{-09}$ |
|          | modularity     | 3.13     | 0.073                 | 495.4    | $2 \times e^{-14}$    |
| Fungi    | P/N ratio      | 298.4    | $8.33 \times e^{-13}$ | 2.7      | 0.0997                |
|          | connectedness  | 97.66    | $2.51 \times e^{-09}$ | 48.07    | $3 \times e^{-07}$    |
|          | average.degree | 407.2    | $8.52 \times e^{-14}$ | 1.77     | 0.204                 |
|          | modularity     | 100.9    | $2 \times e^{-09}$    | 18.61    | $8.66 \times e^{-05}$ |

**Table S5.** P/N ratio, connectedness, average degree and modularity in -R and +R treatments.

|                | Bacteria  |            |           |           | Fungi     |           |           |           |
|----------------|-----------|------------|-----------|-----------|-----------|-----------|-----------|-----------|
|                | 2017      |            | 2018      |           | 2017      |           | 2018      |           |
|                | -R        | +R         | -R        | +R        | -R        | +R        | -R        | +R        |
| P/N ratio      | 2.28±0.03 | 2.22±0.03  | 3.18±0.23 | 6.93±1.25 | 1.61±0.06 | 2.49±0.12 | 3.48±0.79 | 0.99±0.08 |
| Connectedness  | 0.68±0.01 | 0.55±0.01  | 0.68±0.02 | 0.75±0.02 | 0.53±0.10 | 0.66±0.01 | 0.71±0.13 | 0.63±0.05 |
| Average degree | 3.15±0.02 | 3.57±0.02  | 5.00±0.63 | 3.90±0.35 | 2.60±0.06 | 2.55±0.06 | 4.04±0.59 | 2.71±0.13 |
| Modularity     | 0.73±0.01 | 0.74±0.003 | 0.64±0.04 | 0.74±0.02 | 0.78±0.01 | 0.80±0.01 | 0.60±0.05 | 0.73±0.02 |

**Table S6.** Results of PERMANOVA testing the effects of tillage practice and residue management on "C-metabolism"-related and "N-metabolism"-related bacterial communities as predicted by PICRUST.

|                        | "C-metabolism"-related |      |       |      | "N-metabolism"-related |      |       |      |
|------------------------|------------------------|------|-------|------|------------------------|------|-------|------|
|                        | 2017                   |      | 2018  |      | 2017                   |      | 2018  |      |
|                        | $r^2$                  | $P$  | $r^2$ | $P$  | $r^2$                  | $P$  | $r^2$ | $P$  |
| tillage practice (T)   | 0.05                   | 0.91 | 0.18  | 0.08 | 0.05                   | 0.89 | 0.16  | 0.16 |
| Residue management (R) | 0.02                   | 0.85 | 0.06  | 0.34 | 0.02                   | 0.84 | 0.06  | 0.49 |
| T × R                  | 0.18                   | 0.20 | 0.07  | 0.90 | 0.20                   | 0.18 | 0.09  | 0.76 |

**Table S7.** Two way ANOVA examining the effects of tillage practice (T) and residue management (R) on the abundance of facultatively anaerobic bacteria, G<sup>+</sup>/G<sup>-</sup> ratio as predicted by Bugbase, the abundance of pathotroph, saprotroph and symbiotroph as predicted by Funguild.

|                           | T        |          |          |          | R        |          |          |          | T × R    |          |          |          |
|---------------------------|----------|----------|----------|----------|----------|----------|----------|----------|----------|----------|----------|----------|
|                           | 2017     |          | 2018     |          | 2017     |          | 2018     |          | 2017     |          | 2018     |          |
|                           | <i>F</i> | <i>P</i> |
| Facultatively anaerobic   | < 0.001  | 0.99     | 0.38     | 0.54     | 0.97     | 0.34     | 7.41     | 0.017    | 1.79     | 0.20     | 2.52     | 0.13     |
| Grampositive/Gramnegative | 0.003    | 0.96     | 9.53     | 0.008    | 0.75     | 0.4      | 0.18     | 0.68     | 0.69     | 0.42     | 1.35     | 0.26     |
| Pathotroph                | 3.01     | 0.10     | 11.00    | 0.005    | 0.12     | 0.74     | 2.70     | 0.12     | 0.14     | 0.71     | 1.25     | 0.28     |
| Saprotroph                | 3.16     | 0.10     | 4.11     | 0.06     | 0.66     | 0.43     | 4.81     | 0.05     | 0.05     | 0.83     | 0.13     | 0.72     |
| Symbiotroph               | 0.27     | 0.61     | 2.04     | 0.18     | 0.22     | 0.65     | 2.54     | 0.13     | 1.29     | 0.28     | 0.59     | 0.46     |

**Table S8.** Soil physiochemical variables among treatments in the year 2017 and 2018. Value are mean±SD.

|      | Tillage<br>practice | Residue<br>management | pH        | AK (mg/kg)   | AP (mg/kg)  | NO <sub>3</sub> <sup>-</sup> -N<br>(mg/kg) | NH <sub>4</sub> <sup>+</sup> -<br>N(mg/kg) | SOM<br>(g/kg) | SM<br>(%) | SC<br>(Kpa)    |
|------|---------------------|-----------------------|-----------|--------------|-------------|--------------------------------------------|--------------------------------------------|---------------|-----------|----------------|
| 2017 | NT                  | -R                    | 5.72±0.15 | 180.70±22.58 | 36.70±14.32 | 16.47±9.54                                 | 15.75±217                                  | 34.14±5.85    | 18.2±0.2  | 862.00±276.00  |
|      |                     | +R                    | 5.36±0.07 | 179.60±0.63  | 53.45±14.80 | 30.18±9.68                                 | 53.59±42.85                                | 37.56±9.12    | 17.1±0.9  | 1080.67±87.09  |
|      | RT                  | -R                    | 5.20±0.19 | 202.31±11.89 | 60.32±22.76 | 19.64±10.81                                | 30.06±9.21                                 | 33.71±2.93    | 16.6±0.3  | 931.33±34.50   |
|      |                     | +R                    | 5.27±0.18 | 193.52±23.08 | 52.88±32.46 | 10.82±1.37                                 | 19.75±4.43                                 | 42.12±4.33    | 17.8±0.4  | 1126.67±155.31 |
|      | DT                  | -R                    | 5.36±0.11 | 173.01±30.81 | 51.70±25.64 | 42.01±11.65                                | 23.94±3.80                                 | 34.97±5.87    | 18.1±0.6  | 1000.33±34.50  |
|      |                     | +R                    | 5.44±0.19 | 205.61±17.99 | 52.58±8.14  | 33.72±17.91                                | 27.81±7.21                                 | 33.77±2.49    | 18.0±1.1  | 793.00±69.00   |
| 2018 | NT                  | -R                    | 5.66±0.02 | 144.06±28.98 | 45.30±13.85 | 93.38±38.58                                | 37.67±26.86                                | 34.13±8.51    | 21.6±3.5  | 578.33±36.47   |
|      |                     | +R                    | 5.17±0.04 | 119.21±3.97  | 18.01±2.71  | 22.51±10.83                                | 11.54±1.41                                 | 44.51±8.86    | 24.2±0.7  | 495.67±59.88   |
|      | RT                  | -R                    | 5.50±0.06 | 145.94±20.99 | 31.23±13.69 | 157.60±84.52                               | 37.06±43.59                                | 42.20±2.86    | 21.6±2.9  | 252.00±110.77  |
|      |                     | +R                    | 5.63±0.08 | 127.87±0.84  | 54.54±7.35  | 43.34±5.22                                 | 15.79±4.35                                 | 40.33±1.23    | 24.2±1.7  | 316.33±49.92   |
|      | DT                  | -R                    | 5.51±0.20 | 82.69±13.04  | 22.97±10.01 | 83.47±55.58                                | 14.80±4.41                                 | 32.37±1.39    | 22.8±2.0  | 362.67±206.08  |
|      |                     | +R                    | 5.72±0.09 | 80.06±15.53  | 15.73±2.78  | 41.56±8.51                                 | 20.75±5.71                                 | 34.75±2.88    | 24.5±0.9  | 289.00±126.35  |

Abbreviations: AK, available potassium; AP, available phosphorus; SOM, soil organic matter; SM, soil moisture, SC, soil compaction; NT, no tillage; RT, rotary tillage, DT, deep tillage; -R, residue removal; +R, residue retention.

**Table S9.** Results of stepwise multiple-regression models using bacterial and fungal OTU richness as response variables.

| Year | Response variables | $R^2$ | Predictor |      |       | Response variables    | $R^2$ | Predictor                       |       |       |
|------|--------------------|-------|-----------|------|-------|-----------------------|-------|---------------------------------|-------|-------|
|      |                    |       | variable  | $F$  | $P$   |                       |       | variable                        | $F$   | $P$   |
| 2017 | Bacterial          | 0.52  | AK        | 0.87 | 0.19  | Fungal average degree | 0.22  | NO <sub>3</sub> <sup>-</sup> -N | 1.95  | 0.052 |
|      | average degree     |       | SM        | 1.33 | 0.08  |                       |       |                                 |       |       |
|      |                    |       | AP        | 1.50 | 0.15  |                       |       |                                 |       |       |
|      |                    |       | SOM       | 2.26 | 0.07  |                       |       |                                 |       |       |
|      |                    |       | NH4       | 4.42 | 0.04  |                       |       |                                 |       |       |
| 2018 | Bacterial          | 0.58  | AK        | 2.39 | 0.04  | Fungal average degree | 0.68  | AK                              | 1.81  | 0.002 |
|      | average degree     |       | AP        | 1.58 | 0.06  |                       |       | SC                              | 3.15  | 0.04  |
|      |                    |       | SC        | 6.82 | 0.004 |                       |       | NO3                             | 6.05  | 0.04  |
|      |                    |       |           |      |       |                       |       | NH4                             | 14.10 | 0.001 |

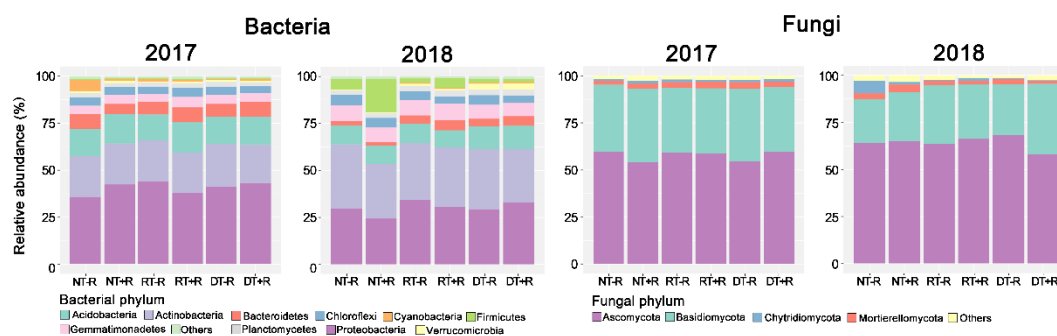

**Figure S1.** The relative abundance of the dominant bacterial (A) and fungal (B) phyla among treatments. Abbreviations: NT, no tillage; RT, rotary tillage; DT, deep tillage; -R, residue removal; +R, residue retention.

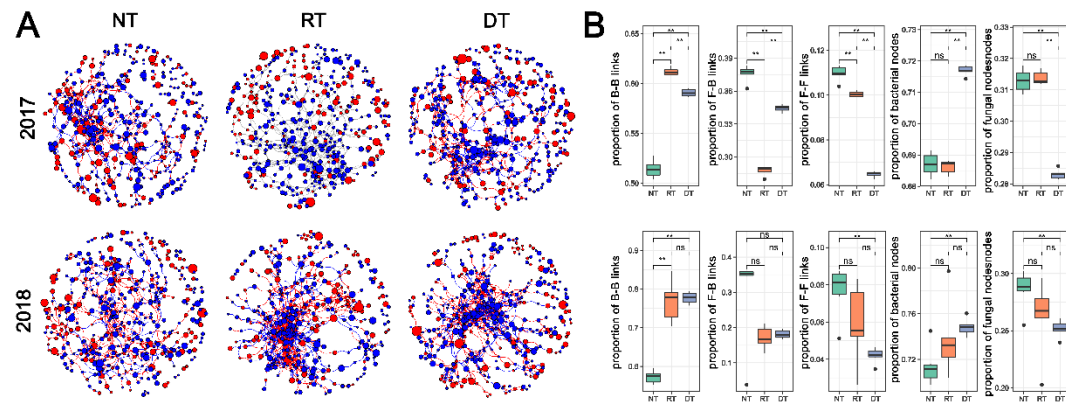

**Figure S2.** Co-occurrence networks of combined soil bacterial-fungal communities among treatments (A), proportion of bacteria-bacteria (B-B) links, fungi-bacteria (F-B) links, fungi-fungi (F-F) links, proportion of bacterial nodes and fungal nodes among treatments. The red and blue lines indicate positive and negative connections between the nodes, respectively. The size of each circle represents the relative abundance of each node. Abbreviations: NT, no tillage; RT, rotary tillage; DT, deep tillage.
